# Supplementary material for: Box–Behnken design of thermo-responsive nano-liposomes loaded with a platinum(iv) anticancer complex: evaluation of cytotoxicity and apoptotic pathways in triple negative breast cancer cells
Source: Royal Society of Chemistry journal article supplement (doi:10.1039/d3na00368j), 2023-01-01
Supplement: d3na00368j1.pdf [file d3na00368j1.pdf]

## **Box-Behnken Design of Thermo-Responsive Nano-Liposomes Loaded with Platinum (IV) Anticancer Complex: Evaluation of Cytotoxicity and Apoptotic Pathways in Triple Negative Breast Cancer Cells**

**Nada K. Sedky<sup>1</sup> Maria Braoudaki<sup>2</sup>, Noha Khalil Mahdy<sup>3</sup>, Kenzy Amin<sup>4</sup>, Iten M. Fawzy<sup>5</sup>, Eleni K. Efthimiadou<sup>6</sup>, Rana A. Youness<sup>7,8</sup>, Sherif Ashraf Fahmy<sup>9\*</sup>**

<sup>1</sup>Department of Biochemistry, School of Life and Medical Sciences, University of Hertfordshire Hosted by Global Academic Foundation, R5 New Garden City, New Administrative Capital, Cairo, Egypt.

<sup>2</sup>Department of Clinical, Pharmaceutical, and Biological Science, School of Life and Medical Sciences, University of Hertfordshire, Hatfield AL10 9AB, UK

<sup>3</sup>Department of Pharmaceutics and Industrial Pharmacy, Faculty of Pharmacy, Cairo University, Kasr El-Aini Street, 11562 Cairo, Egypt.

<sup>4</sup>Department of Biochemistry, School of Life and Medical Sciences, University of Hertfordshire Hosted by Global Academic Foundation, R5 New Garden City, New Administrative Capital, Cairo, Egypt.

<sup>5</sup>Department of Pharmaceutical Chemistry, Faculty of Pharmacy, Future University in Egypt, 11835 Cairo, Egypt.

<sup>6</sup>Inorganic Chemistry Laboratory, Department of Chemistry, National and Kapodistrian University of Athens, Panepistimiopolis, Zografou 157 71, Greece.

<sup>7</sup>Biology and Biochemistry Department, Faculty of Biotechnology, German International University (GIU), New Administrative Capital, Cairo, Egypt

<sup>8</sup>Department of Biology and Biochemistry, School of Life and Medical Sciences, University of Hertfordshire Hosted by Global Academic Foundation, R5 New Garden City, New Administrative Capital, Cairo, Egypt.

<sup>9</sup>Department of Chemistry, School of Life and Medical Sciences, University of Hertfordshire Hosted by Global Academic Foundation, R5 New Garden City, New Capital, Cairo 11835, Egypt.

**\*Correspondance: S.A.F.; Phone: +201222613344; Email: [sheriffahmy@aucegypt.edu](mailto:sheriffahmy@aucegypt.edu)**

**Table S1.** Average particle size, polydispersity index, zeta potential, and entrapment efficiency for the Asp/TLs prepared formulae

| <b>Formula</b> | <b>Particle Size (nm)</b> | <b>Polydispersity Index</b> | <b>Zeta Potential (mV)</b> | <b>Entrapment Efficiency (%)</b> |
|----------------|---------------------------|-----------------------------|----------------------------|----------------------------------|
| <b>F1</b>      | 180.2                     | 0.29                        | -7.84                      | 61.67                            |
| <b>F2</b>      | 140.1                     | 0.25                        | -21.67                     | 84.2473                          |
| <b>F3</b>      | 137.6                     | 0.23                        | -28.07                     | 89.6                             |
| <b>F4</b>      | 131.233                   | 0.245                       | -23.03                     | 84.9075                          |
| <b>F5</b>      | 136.6                     | 0.255                       | -30.98                     | 82.9                             |
| <b>F6</b>      | 120.67                    | 0.14                        | -20.12                     | 82.6                             |
| <b>F7</b>      | 185                       | 0.28                        | -5.98                      | 62.98                            |
| <b>F8</b>      | 118.9                     | 0.13                        | -18.7                      | 78.8851                          |
| <b>F9</b>      | 185                       | 0.289                       | -8.24                      | 60.43                            |
| <b>F10</b>     | 119.67                    | 0.135                       | -22.98                     | 79.89                            |
| <b>F11</b>     | 135.7                     | 0.249                       | -32.98                     | 83.78                            |
| <b>F12</b>     | 158.3                     | 0.248                       | -23.01                     | 83.78                            |
| <b>F13</b>     | 123                       | 0.132                       | -21.67                     | 78.4741                          |
| <b>F14</b>     | 136.78                    | 0.255                       | -31.78                     | 83.78                            |
| <b>F15</b>     | 135.01                    | 0.256                       | -34.45                     | 84.0706                          |
| <b>F16</b>     | 120                       | 0.27                        | -25.58                     | 82.284                           |
| <b>F17</b>     | 175                       | 0.301                       | -6.78                      | 63.98                            |

**Table S2.** Composition of the 3<sup>3</sup> BBD for the prepared Asp/TLs NPs.

|                | <b>Factor 1</b>          | <b>Factor 2</b>           | <b>Factor 3</b>    |
|----------------|--------------------------|---------------------------|--------------------|
| <b>Formula</b> | <b>Cholesterol:2DPPC</b> | <b>DSPE-PEG2000:2DPPC</b> | <b>lipid:1Drug</b> |
| <b>F1</b>      | 1.5                      | 0.26                      | 5                  |
| <b>F2</b>      | 1                        | 0.39                      | 20                 |
| <b>F3</b>      | 1                        | 0.26                      | 12.5               |
| <b>F4</b>      | 1                        | 0.39                      | 5                  |
| <b>F5</b>      | 1                        | 0.26                      | 12.5               |
| <b>F6</b>      | 0.5                      | 0.39                      | 12.5               |
| <b>F7</b>      | 1.5                      | 0.26                      | 20                 |
| <b>F8</b>      | 0.5                      | 0.26                      | 5                  |
| <b>F9</b>      | 1.5                      | 0.39                      | 12.5               |
| <b>F10</b>     | 0.5                      | 0.13                      | 12.5               |
| <b>F11</b>     | 1                        | 0.26                      | 12.5               |
| <b>F12</b>     | 1                        | 0.13                      | 20                 |
| <b>F13</b>     | 0.5                      | 0.26                      | 20                 |
| <b>F14</b>     | 1                        | 0.26                      | 12.5               |
| <b>F15</b>     | 1                        | 0.26                      | 12.5               |
| <b>F16</b>     | 1                        | 0.13                      | 5                  |
| <b>F17</b>     | 1.5                      | 0.13                      | 12.5               |
